# Supplementary material for: Prevention of a dengue outbreak via the large-scale deployment of Sterile Insect Technology in a Brazilian city: a prospective study
Source: PubMed Central journal article supplement — Lancet Reg Health Am. 2023 May 1;21:100498. doi: 10.1016/j.lana.2023.100498 (PMC10176055; doi:10.1016/j.lana.2023.100498), 2023-05-01
Supplement: mmc1.pdf [file mmc1.pdf]

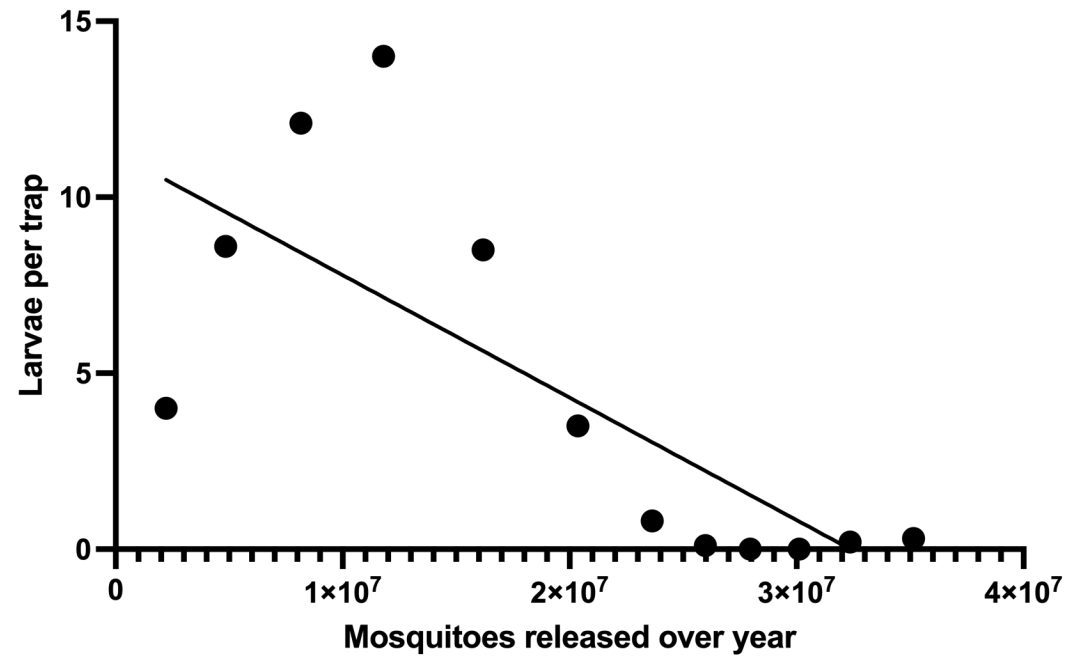

**Figure S1.** Correlation between releases of NVC sterile male mosquitoes and viable progeny. A linear regression analysis was performed to verify the dependence between mean of viable progeny and amount of NVC mosquitoes released.  $P < 0.005$ ,  $R^2 = 0.567$ .

**Table S2. Climate and demographic characteristics of Ortigueira and the neighboring cities (Source: Brazil population census).**

| City              | Territorial area (Km2) | Population | Demographic density (inhabitants/km2) | HDI*  | GDP per capita (reais) | Temperature variation | Umidity | Rain precipitation | Climate** | Bioma     | Altitude (meters) |
|-------------------|------------------------|------------|---------------------------------------|-------|------------------------|-----------------------|---------|--------------------|-----------|-----------|-------------------|
| Apucarana         | 558,389                | 134,996    | 216                                   | 0,748 | 25,602                 | 20,1-21               | 70-75   | 1,700              | STHS      | Pluvial   | 860               |
| Grandes Rios      | 314,198                | 5,618      | 21                                    | 0,658 | 20,909                 | 20,1-21               | 70-75   | 1,700              | STHS      | Pluvial   | 700               |
| Imbaú             | 330,703                | 13,111     | 34                                    | 0,622 | 16,574                 | 18,1-19               | 75-80   | 1,700              | STHS      | Araucária | 940               |
| Londrina          | 1652,569               | 569,733    | 307                                   | 0,778 | 37,912                 | 21,1-22               | 70-75   | 1,700              | STHS      | Pluvial   | 610               |
| Marilândia do Sul | 384,424                | 8,836      | 23                                    | 0,691 | 36,487                 | 20,1-21               | 70-75   | 1,700              | STHS      | Pluvial   | 760               |
| Mauá da Serra     | 108,324                | 10,601     | 79                                    | 0,652 | 29,157                 | 19,1-20               | 70-75   | 1,700              | STHS      | Araucária | 1030              |
| Ortigueira        | 2429,564               | 22,141     | 10                                    | 0,609 | 131,023                | 19,1-20               | 75-80   | 1,700              | STHS      | Araucária | 750               |
| Tamarana          | 472,155                | 14,797     | 26                                    | 0,621 | 20,244                 | 20,1-21               | 70-75   | 1,700              | STHS      | Pluvial   | 750               |
| Telêmaco Borba    | 1382,861               | 78,974     | 51                                    | 0,734 | 45,262                 | 19,1-20               | 75-80   | 1,700              | STHS      | Araucária | 740               |
| Tibagi            | 2951,567               | 20,522     | 7                                     | 0,664 | 41,034                 | 18,1-19               | 75-80   | 1,700              | STMS      | Campos    | 720               |

\*HDI: Human development Index

\*\*STHS: Subtropical climate, with hot summers; STMS: Subtropical climate, with mild summers

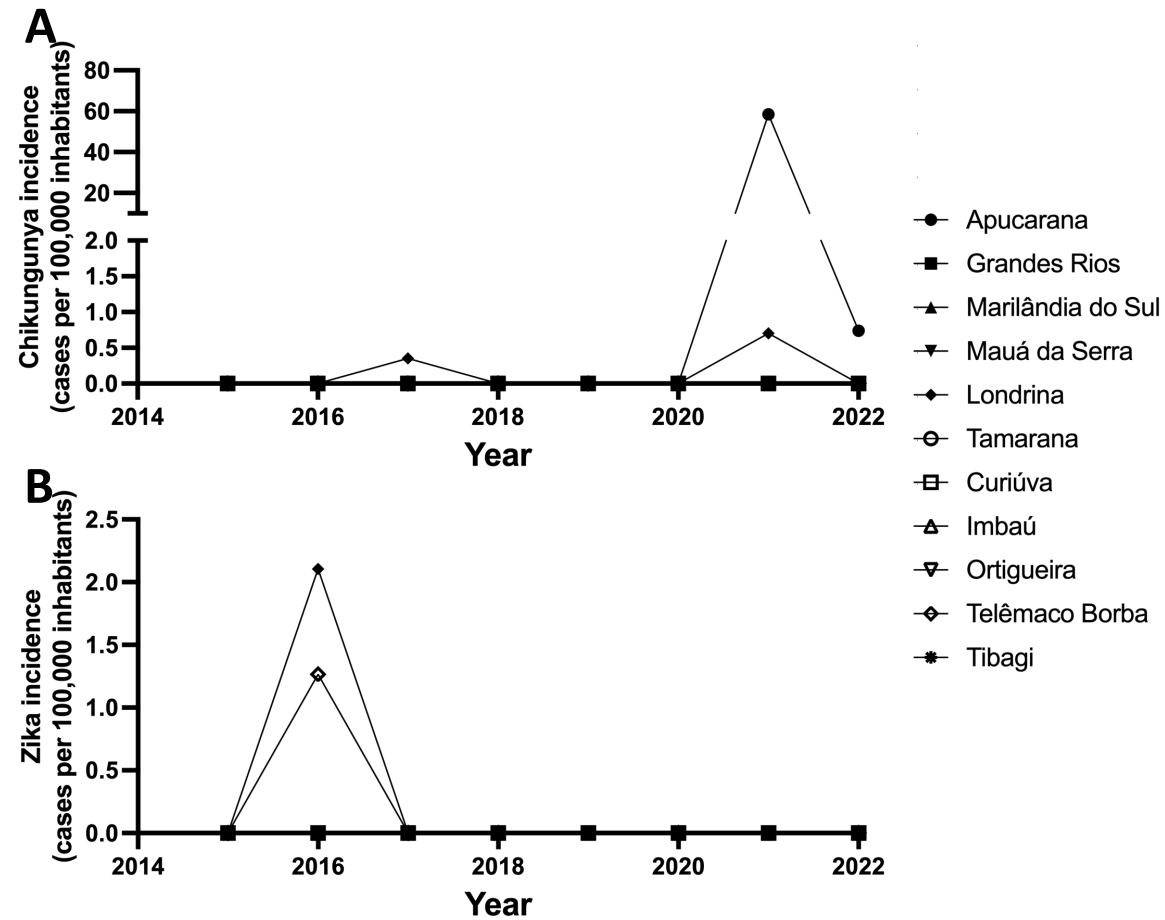

**Figure S3. Historical arboviruses incidence in Ortigueira vs neighboring cities.** Chikungunya (A) and Zika (B) incidence from 2014 to 2022 (displayed as cases per 100,000 inhabitants) in Ortigueira and other 10 neighboring cities, as indicated. Data source: Brazilian National Disease Surveillance System (SINAN).

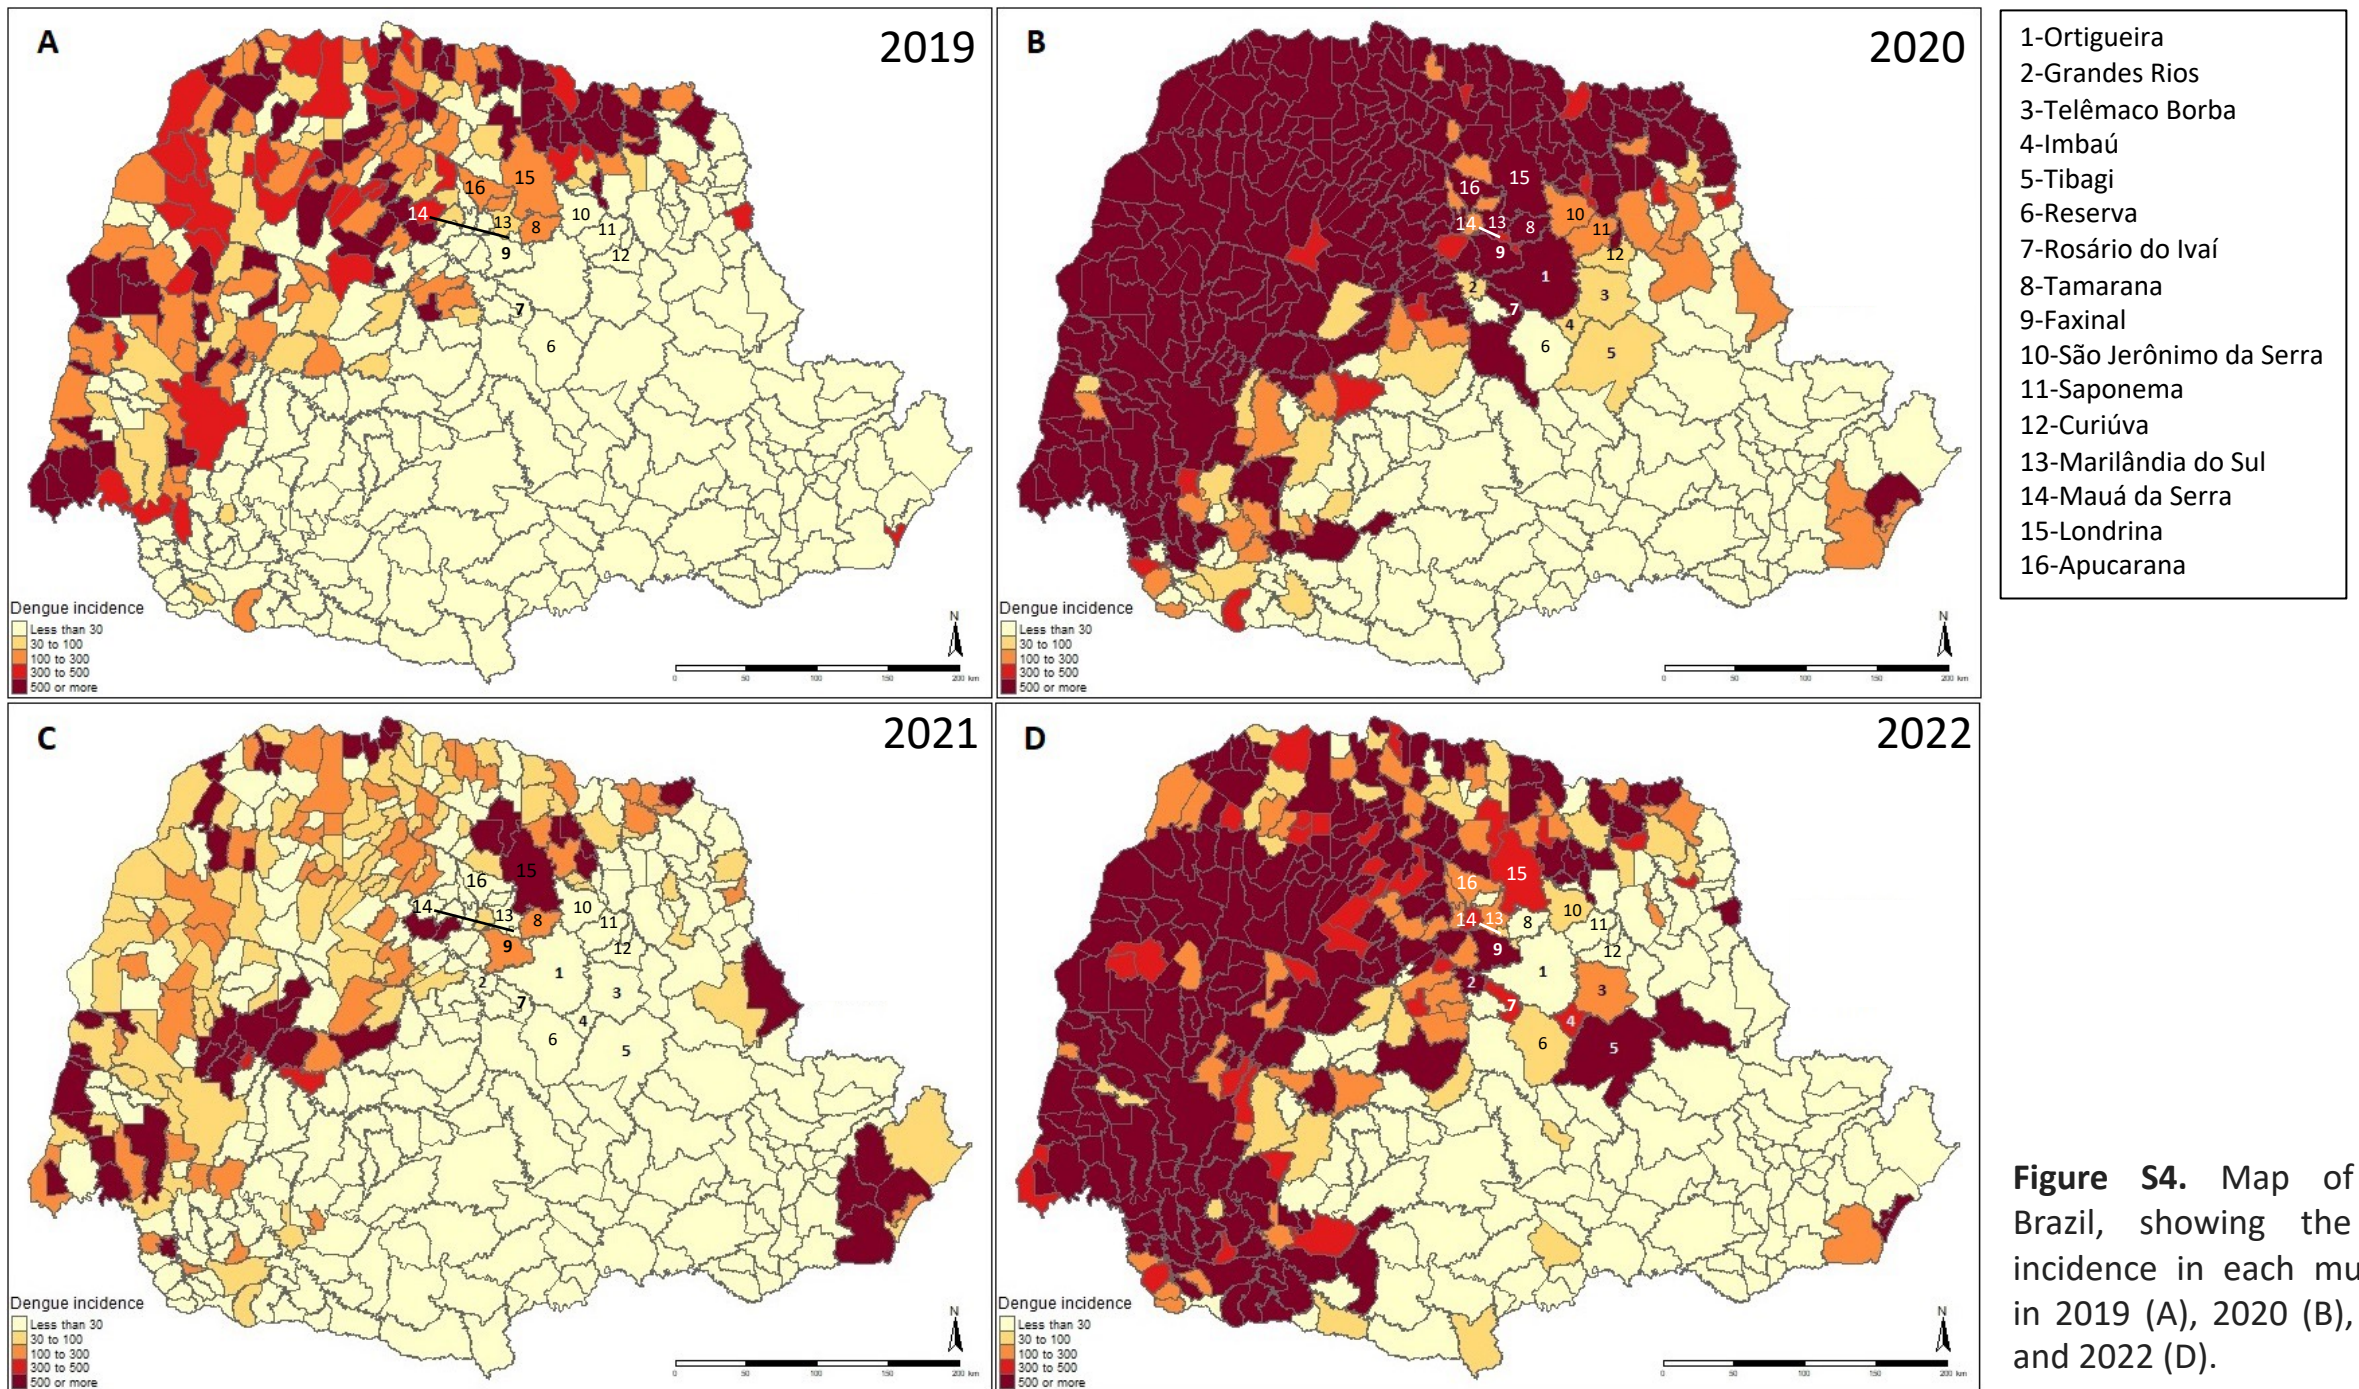

**Figure S4.** Map of Paraná, Brazil, showing the dengue incidence in each municipality in 2019 (A), 2020 (B), 2021 (C) and 2022 (D).
